# Supplementary material
Source: PubMed Central journal article supplement (PMC6544848)

**Table S1. Oligonucleotide sequences**

| <b>Application</b>                                       | <b>Target</b>        | <b>Forward Primer</b>                                                           | <b>Reverse Primer</b>                                                             |
|----------------------------------------------------------|----------------------|---------------------------------------------------------------------------------|-----------------------------------------------------------------------------------|
| q-RT-PCR                                                 | Rat<br><i>Hmox1</i>  | 5'-GAT GGC CTC CTT GTA CCA<br>TAT C-3'                                          | 5'-AGC TCC TCA GGG AAG TAG<br>AG-3'                                               |
|                                                          | Rat <i>Srxn1</i>     | 5'-GGG TTC CGT TCT TCA GTC<br>TAT G-3'                                          | 5'-CTT GTC TCC GAG TCC ATC TTT<br>C-3'                                            |
|                                                          | Rat<br><i>Txnrd1</i> | 5'-CGG GAG AAG AAG GTT GTC<br>TAT G-3'                                          | 5'-GAA CCG CTC TGC TGA GTA<br>AA-3'                                               |
|                                                          | Rat <i>Nrf2</i>      | 5'-GCT ATT TTC CAT TCC CGA<br>GTT AC-3'                                         | 5'-ATT GCT GTC CAT CTC TGT<br>CAG-3'                                              |
|                                                          | Rat <i>Hdac4</i>     | 5'-CAG CTC CCT TGA CCA GAG<br>CTC-3'                                            | 5'-TAA GCC TTG ACC GTA ATT<br>TCA G-3'                                            |
|                                                          | Rat <i>Hdac5</i>     | 5'-TCA CCG CAA AAC TCC TAC<br>AG -3'                                            | 5'-ATG GCG GTC AAG TCA TGA-3'                                                     |
|                                                          | Rat <i>Hdac9</i>     | 5'-GAG AGG CAT CGC AGA<br>GAG C-3'                                              | 5'-CCC ACG GAA TGA TTC TTT<br>CCA-3'                                              |
| Cloning KEAP1                                            |                      | 5'-GAA GGA TCC CAG CCA GAT<br>CCC AGG CCT AGC-3'                                | 5'-CAA CTC GAG TCA ACA GGT<br>ACA GTT CTG CTG-3'                                  |
| Oligos for human HDAC5<br>H1006A site mutation           |                      | 5'-GCC CTG GAG GGA GGC GCT<br>GAC TTG ACC GCC ATC TGT G-<br>3'                  | 5'-CAC AGA TGG CGG TCA AGT<br>CAG CGC CTC CCT CCA GGG C-3'                        |
| shRNA oligos<br>annealed and<br>ligated into<br>pENTR/U6 | shControl            | 5'-ACC GCG CGA TAG CGC TAA<br>TAA TTT CTC GAG AAA TTA<br>TTA GCG CTA TCG CGC-3' | 5'-AAA AGC GCG ATA GCG CTA<br>ATA ATT TCT CGA GAA ATT ATT<br>AGC GCT ATC GCG C-3' |
|                                                          | shHD5 #1             | 5'-CAC CGC TAC GAC AAT GGG<br>AAC TTC TCG AAA GAA GTT<br>CCC ATT GTC GTA GC -3' | 5'-AAA AGC TAC GAC AAT GGG<br>AAC TTC TTT CGA GAA GTT CCC<br>ATT GTC GTA GC-3'    |
|                                                          | shHD5 #2             | 5'-CAC CGG ACA GTA GTG ATG<br>CCC ATT GCG AAC AAT GGG<br>CAT CAC TAC TGT CC -3' | 5'-AAA AGG CAA GTT CAT GAG<br>CAC ATC CTT CGG GAT GTG CTC<br>ATG AAC TTG CC-3'    |
|                                                          | shHD4                | 5'-CAC CGC ACC TCA GCA AGA<br>TGA TTT CCG AAG AAA TCA<br>TCT TGC TGA GGT GC-3'  | 5'-AAA AGC ACC TCA GCA AGA<br>TGA TTT CTT CGG AAA TCA TCT<br>TGC TGA GGT GC-3'    |
|                                                          | shHD9                | 5'-CAC CGC CAG TAT GGA AGT<br>GGC ATT GCG AAC AAT GCC<br>ACT TCC ATA CTG GC-3'  | 5'-AAA AGC CAG TAT GGA AGT<br>GGC ATT GTT CGC AAT GCC ACT<br>TCC ATA CTG GC-3'    |

**Table S2**

| REAGENT or RESOURCE                         | SOURCE                   | IDENTIFIER    |
|---------------------------------------------|--------------------------|---------------|
| Antibodies                                  |                          |               |
| HMOX1 (1:1000)                              | Enzo Life Sciences       | ADI-SPA-895-D |
| HDAC4 (1:1000)                              | Cell Signaling           | 5392          |
| HDAC5 (1:1000)                              | Cell Signaling           | 20458         |
| NRF2 (1:1000)                               | Cell Signaling           | 12721         |
| Normal rabbit IgG (10 µg)                   | Cell Signaling           | 2729S         |
| KEAP1 (1:1000)                              | Proteintech Group, Inc   | 10503-2-AP    |
| α-actinin (1:1000; IF)                      | Sigma                    | A7811         |
| FLAG M2-HRP (1:2000)                        | Sigma                    | A8592         |
| Calnexin (1:500)                            | Santa Cruz Biotechnology | sc-11397      |
| α-tubulin (1:1000)                          | Santa Cruz Biotechnology | sc-23948      |
| MEF-2 (1:500)                               | Santa Cruz Biotechnology | sc-313        |
| Normal mouse IgG (10 µg)                    | Santa Cruz Biotechnology | Sc-2025       |
| Rabbit-HRP (1:2000)                         | Southern Biotech         | 4050-05       |
| Mouse-HRP (1:2000)                          | Southern Biotech         | 1031-05       |
| Chemicals and kits                          |                          |               |
| Bovine serum albumin, Fraction V            | Akron                    | AK8905        |
| TMP195                                      | Cellagen Technologies    | C-8619        |
| TMP269                                      | Cellagen Technologies    | C-8626        |
| DMEM                                        | Corning                  | 10-017        |
| DMEM with high glucose                      | Corning                  | 10-013        |
| MEM                                         | Corning                  | 10-010        |
| Penicillin-Streptomycin-L-Glutamine         | Corning                  | 30-009-CI     |
| AI-1                                        | Focus                    | 10-1471       |
| MEM                                         | Gibco                    | 11575         |
| Opti-MEM™ I Reduced Serum Medium            | Gibco                    | 31985         |
| Fetal Bovine Serum (FBS)                    | Gemini Bio Products      | 100-106       |
| Bovine Calf Serum                           | Gemini Bio Products      | 100-506       |
| Nutridoma™-SP                               | Roche                    | 11011375001   |
| Lipofectamine™ 3000 transfection reagent    | ThermoFisher             | L3000008      |
| Lipofectamine™ RNAiMAX Transfection Reagent | ThermoFisher             | 13778150      |

|                                                                     |                                 |                              |
|---------------------------------------------------------------------|---------------------------------|------------------------------|
| MitoSOX™ red mitochondrial superoxide indicator                     | ThermoFisher                    | M36008                       |
| Halt™ Protease and Phosphatase Inhibitor Single-Use Cocktail (100X) | ThermoFisher                    | 78443                        |
| N-Acetyl-L-Cysteine                                                 | Sigma                           | N9165                        |
| Trichostatin A                                                      | Sigma                           | T8552                        |
| Penicillin G (PCN) K salt                                           | Sigma                           | P7794                        |
| Vitamin B12                                                         | Sigma                           | V6629                        |
| siRNA #1 for Rat NRF2                                               | Sigma                           | NM_031789/SASI_Rn01_00089762 |
| siRNA #2 for Rat NRF2                                               | Sigma                           | NM_031789/SASI_Rn01_00089764 |
| Ampicillin (Sodium)                                                 | Gold Biotechnology              | A-301-5                      |
| Kanamycin                                                           | Gold Biotechnology              | K-120-5                      |
| I-1985                                                              | Bachem                          | 4060676                      |
| I-1875                                                              | Bachem                          | 4033972                      |
| ZLPA                                                                | Genscript                       | Ref. 41                      |
| Anti-DYKDDDDK IP Resin                                              | Genscript                       | L00425                       |
| Protein A/G Plus Agarose                                            | Santa Cruz Biotechnology        | sc-2003                      |
| QIAzol Lysis Reagent                                                | Qiagen                          | 79306                        |
| RNeasy Plus Mini Kit                                                | Qiagen                          | 74134                        |
| Cell fractionation kit                                              | Abcam                           | Ab109719                     |
| 1-bromo-3-chloropropane (BCP)                                       | Molecular Research Center, Inc. | BP151                        |

#### Reagents for PCR & Cloning

|                                        |                    |         |
|----------------------------------------|--------------------|---------|
| DreamTaq Green PCR Master Mix          | ThermoFisher       | K1081   |
| Verso cDNA Synthesis Kit               | ThermoFisher       | AB1453B |
| BLOCK-iT™ U6 RNAi Entry Vector Kit     | ThermoFisher       | K494500 |
| pAd/BLOCK-iT™-DEST RNAi Gateway vector | ThermoFisher       | V49220  |
| pAd/CMV/V5-DEST™ Gateway™ Vector Kit   | ThermoFisher       | V49320  |
| PowerUp™ SYBR™ Green Master Mix        | Applied Biosystems | A25778  |
| PFUTurbo DNA Polymerase                | Agilent            | 600250  |
| T4 DNA Ligase                          | NEB                | M0202S  |

# Figure S1

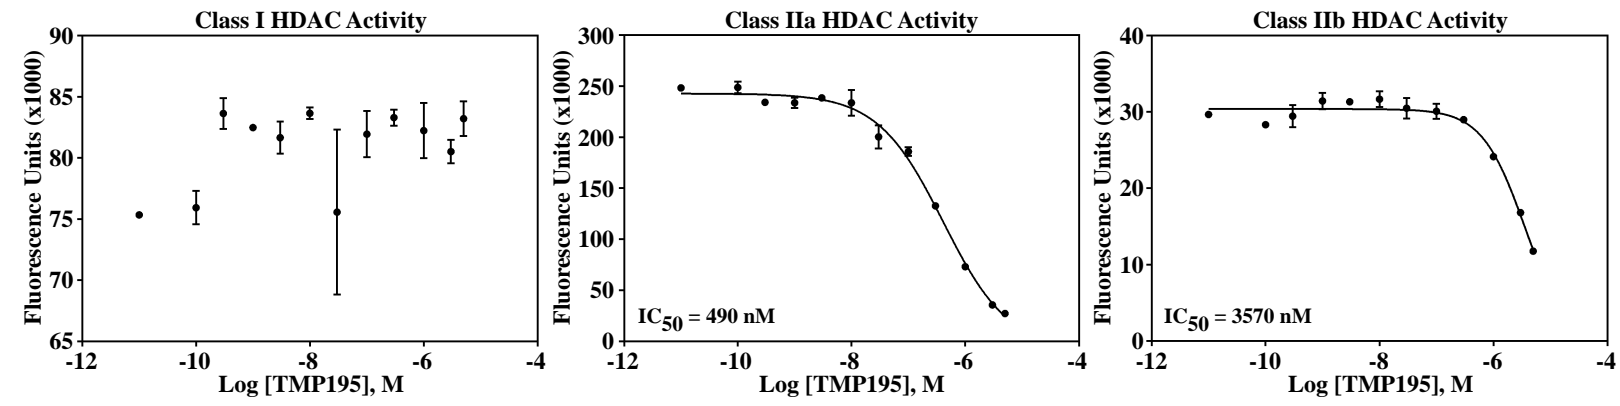

**Figure S2**

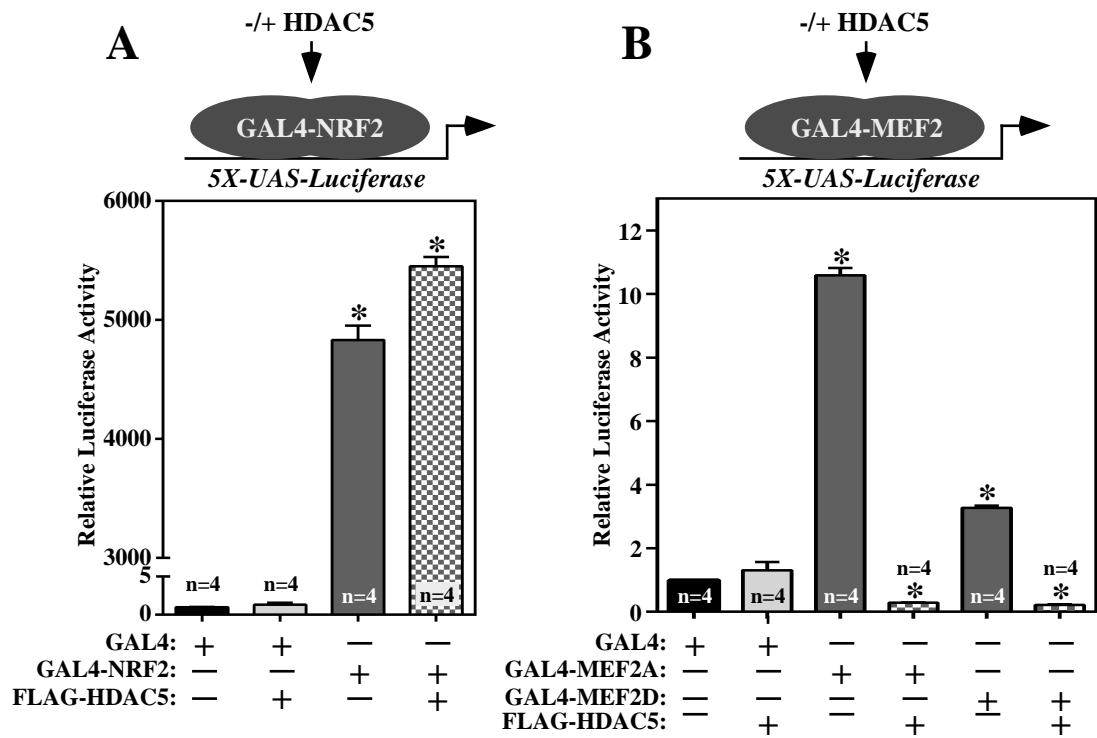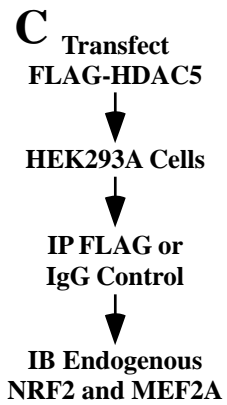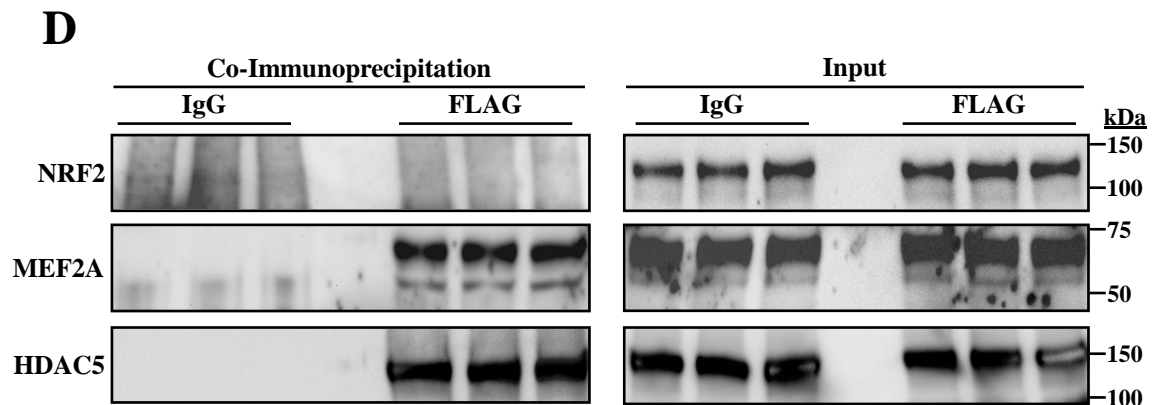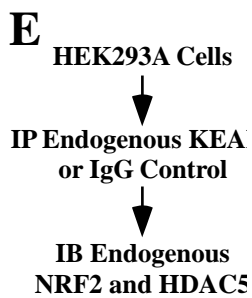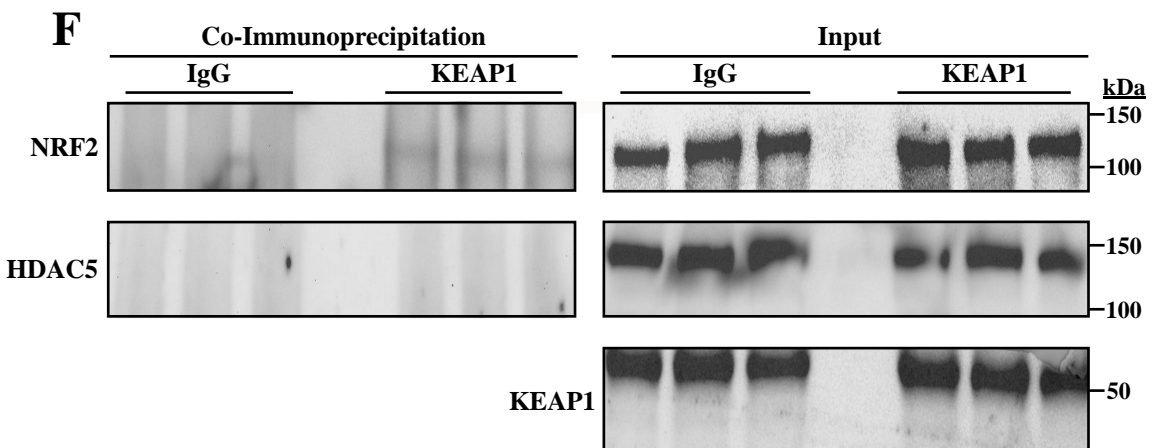

Supplement: supp_RA118.007006_142377_1_supp_311766_ppn81f.pdf [file supp_RA118.007006_142377_1_supp_311766_ppn81f.pdf]
